# Supplementary material for: Prevention and Control Are Not a Regional Matter: A Spatial Correlation and Molecular Linkage Analysis Based on Newly Reported HIV/AIDS Patients in 2021 in Jiangsu, China
Source: MDPI journal article supplement (doi:10.3390/v15102053), 2023-10-06
Supplement: s1 [file s1]

## Supplementary Materials

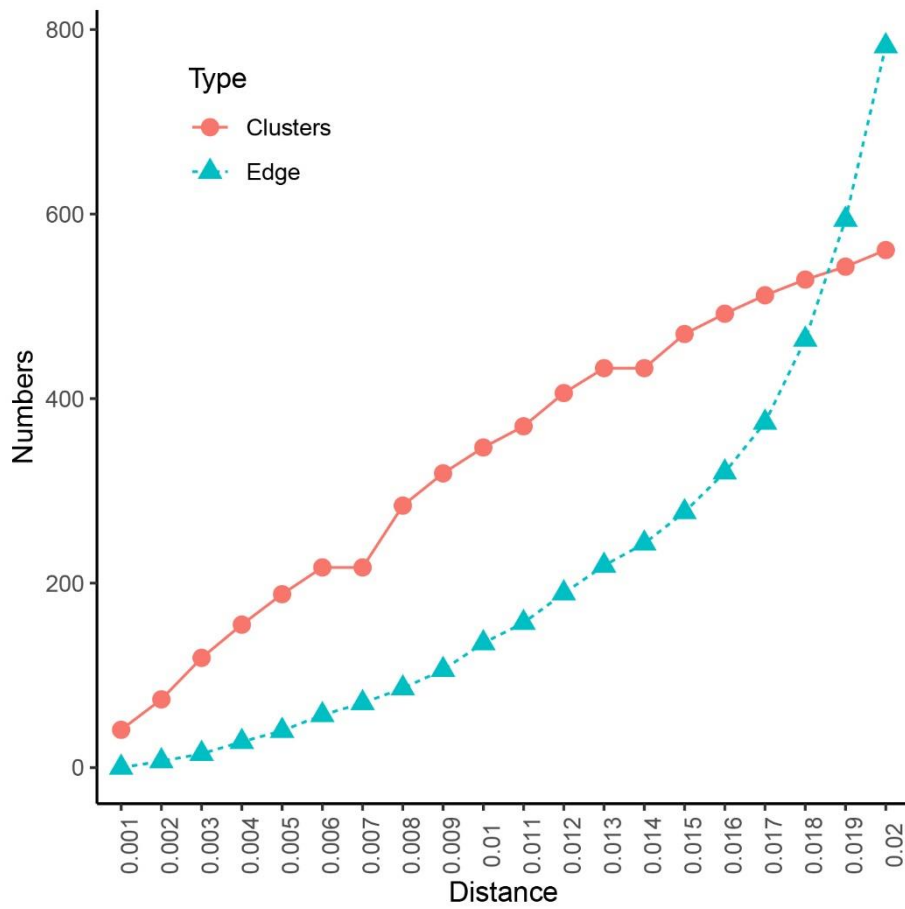

Figure S1 Clusters and edges number line graph under different thresholds

Table S1 Characteristics of 13 cities in Jiangsu Province

| Cities       | Cases | Permanent resident<br>population | Area (km <sup>2</sup> ) | Population<br>density<br>(People/km <sup>2</sup> ) | Urbanization<br>rate (%) |
|--------------|-------|----------------------------------|-------------------------|----------------------------------------------------|--------------------------|
| Nan Jing     | 507   | 9423400                          | 6587                    | 1430.606                                           | 86.8                     |
| Wu Xi        | 488   | 7464000                          | 4627                    | 1613.140                                           | 82.8                     |
| Su Zhou      | 728   | 12847800                         | 8488                    | 1513.643                                           | 81.7                     |
| Zhen Jiang   | 132   | 2681000                          | 3847                    | 696.907                                            | 79.5                     |
| Chang Zhou   | 343   | 5366200                          | 4372                    | 1227.402                                           | 77.1                     |
| Yang Zhou    | 162   | 4515600                          | 6591                    | 685.116                                            | 71.0                     |
| Nan Tong     | 363   | 7733000                          | 8001                    | 966.504                                            | 70.4                     |
| Tai Zhou     | 147   | 4516800                          | 5787                    | 780.508                                            | 68.1                     |
| Huai An      | 144   | 4562200                          | 10072                   | 452.959                                            | 65.7                     |
| Xu Zhou      | 260   | 9028500                          | 11259                   | 801.892                                            | 65.6                     |
| Yan Cheng    | 216   | 6713000                          | 16972                   | 395.534                                            | 64.1                     |
| Su Qian      | 118   | 4986800                          | 8555                    | 582.911                                            | 62.2                     |
| Lian Yungang | 131   | 4602000                          | 7615                    | 604.334                                            | 61.5                     |
